# Supplementary material for: Langmuir and Langmuir–Blodgett films of a novel tryptophan peptide lipidElectronic supplementary information (ESI) available: synthesis of tryptophan peptide lipid. See http://www.rsc.org/suppdata/cc/b1/b106597c/
Source: Royal Society of Chemistry journal article supplement (doi:10.1039/b106597c), 2002-03-15
Supplement: b106597c.doc [file b106597c.doc]

# Supplementary data

The synthesis of tryptophan peptide lipid

FMOC-protected amino acids and Wang resins were obtained from Advanced ChemTech. Other reagents, solvents and stearic acid for the synthesis of peptide lipids were purchased from Aldrich Chemical Co. The synthesis of tryptophan peptide lipidhas been accomplished using 9-fluorenylmethoxycarbonyl (FMOC) chemistry with diisopropylcarbodiimide/1-hydroxybenzotriazole *in situ* activation method. The loading of first glycine to the resin was done according to literature procedure.1 The coupling and deprotection cycle has followed the literature procedure.2,3,4 FMOC-protected amino acids were added to the glycine loaded resin in 5-fold molar excess to amino groups at a concentration of 0.3 M. After the coupling of the last amino acid residues, the resins were incubated in dichloromethane solution of succinamidyl ester of stearic acid at a concentration of 0.1 M for overnight. After washing, the peptide lipids were cleaved from resin by incubating the resin in CF3COOH/H2O(95/5, v/v) for two hours. The cleavage solution was concentrated *en vacuo*. The oil residue was precipitated from cold deionized water, washed with cold deionized water for 5-8 times and centrifuged. After lyophilization, the product was used for surface chemistry study without further purification. The purity was confirmed by HPLC to be more than 96%.

*References:*

1) P. Sieber, *Tetrahedron Lett*. 1987, **28**, 6147.

2) R. N.Zuckermann, J. M. Kerr, M. A. Siani, S. C. Banville, D. V. Santi, *Proc. Natl. Acad. Sci. USA,* 1992, **89**, 4505.

3) G. B. Fields, R.L. Noble, *Int. J. Peptide Protein Res*. 1990, **35**, 161.

4) G. B. Fields, *Methods in* *Enzymology Volume 289: Solid phase peptide synthesis*. 1997, Academic Press Inc., New York.
